# Supplementary material
Source: publisher site journal article supplement (https://www.spandidos-publications.com/5833/downloadSupplementary)

Figure S1. Schematic diagram of isolation methods. Process of isolation of BJ-5ta Exo from BJ-5ta fibroblasts. BJ-5ta Exo, exosomes derived from BJ-5ta cells.

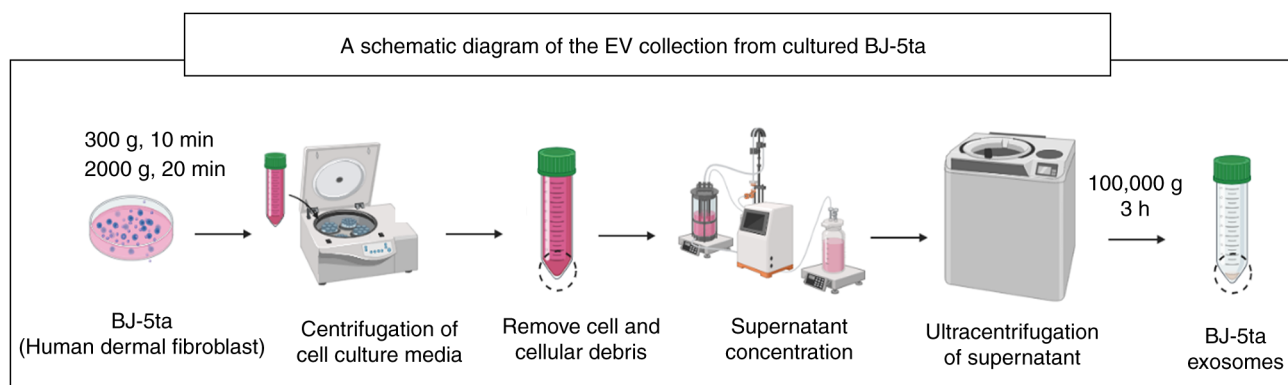

Figure S2. Subcutaneous injection of BJ-5ta-Ex attenuates UVB-induced wrinkle formation on the skins of mice. (A) Schematic diagram of the animal experiments. The dorsal skin of the hairless mice was subjected to UVB irradiation, followed by the administration of BJ-5ta Exo ( $10^6$  or  $10^8$  particles/ml) for 8 weeks. (B) Bodyweight changes. BJ-5ta Exo, exosomes derived from BJ-5ta cells.

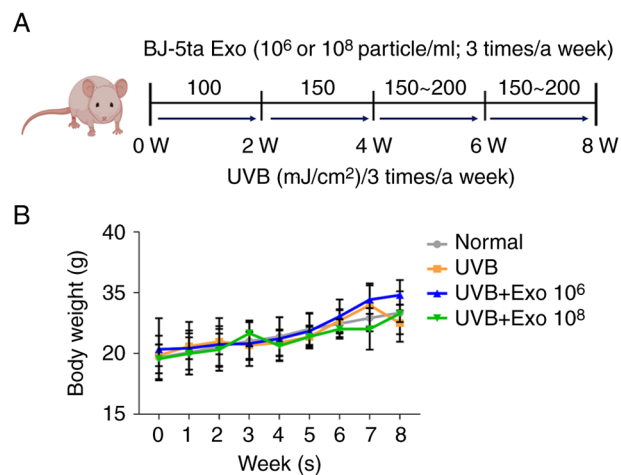

Figure S3. Expression of filaggrin in the dorsal skin of mice. Filaggrin was analyzed using immunohistochemistry. Scale bar, 50  $\mu$ m. BJ-5ta Exo, exosomes derived from BJ-5ta cells.

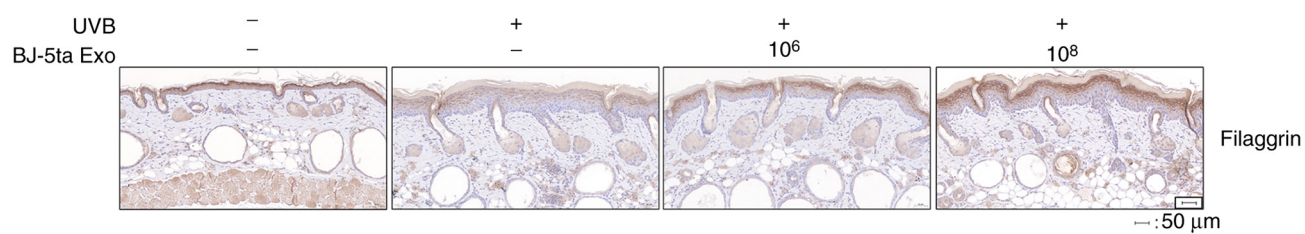

Supplement: Supplementary file 1 [file downloadSupplementary]
